# Supplementary material for: Puppyhood diet as a factor in the development of owner‐reported allergy/atopy skin signs in adult dogs in Finland
Source: PubMed Central journal article supplement (PMC8478020; doi:10.1111/jvim.16211), 2021-07-14
Supplement: JVIM-35-2374-s001.pdf [file JVIM-35-2374-s001.pdf]

The following question from the DogRisk FFQ is used in the current study (only in Finnish language: [www.ruokintakysely.fi](http://www.ruokintakysely.fi) )

**Question 21.\*** Has your dog had any of the following diseases? Select 1-4 ticks per line + starting age, if it has/had the disease

| Diseases                                       | Has your dog had it? <sup>¥</sup> |                          | How often ?              |                          | It started at the age of |                 | Does it still have the disease? | The disease disappeared after changing the diet | I have not noticed that a diet change would have helped |
|------------------------------------------------|-----------------------------------|--------------------------|--------------------------|--------------------------|--------------------------|-----------------|---------------------------------|-------------------------------------------------|---------------------------------------------------------|
|                                                | Yes                               | No                       | Rarely                   | Often                    | Years                    | Months          |                                 |                                                 |                                                         |
| Ear inflammation                               | <input type="checkbox"/>          | <input type="checkbox"/> | <input type="checkbox"/> | <input type="checkbox"/> | Choose an item.          | Choose an item. | <input type="checkbox"/>        | <input type="checkbox"/>                        | <input type="checkbox"/>                                |
| Dermatitis (eg rash, hot-spot)                 | <input type="checkbox"/>          | <input type="checkbox"/> | <input type="checkbox"/> | <input type="checkbox"/> | Choose an item.          | Choose an item. | <input type="checkbox"/>        | <input type="checkbox"/>                        | <input type="checkbox"/>                                |
| Demodicosis                                    | <input type="checkbox"/>          | <input type="checkbox"/> | <input type="checkbox"/> | <input type="checkbox"/> | Choose an item.          | Choose an item. | <input type="checkbox"/>        | <input type="checkbox"/>                        | <input type="checkbox"/>                                |
| Inflammation between the toes (= furunculosis) | <input type="checkbox"/>          | <input type="checkbox"/> | <input type="checkbox"/> | <input type="checkbox"/> | Choose an item.          | Choose an item. | <input type="checkbox"/>        | <input type="checkbox"/>                        | <input type="checkbox"/>                                |
| “Allergy”, atopy, (skin-symptoms) <sup>©</sup> | <input type="checkbox"/>          | <input type="checkbox"/> | <input type="checkbox"/> | <input type="checkbox"/> | Choose an item.          | Choose an item. | <input type="checkbox"/>        | <input type="checkbox"/>                        | <input type="checkbox"/>                                |
| Acanthosis nigricans                           | <input type="checkbox"/>          | <input type="checkbox"/> | <input type="checkbox"/> | <input type="checkbox"/> | Choose an item.          | Choose an item. | <input type="checkbox"/>        | <input type="checkbox"/>                        | <input type="checkbox"/>                                |
| Seborrhea                                      | <input type="checkbox"/>          | <input type="checkbox"/> | <input type="checkbox"/> | <input type="checkbox"/> | Choose an item.          | Choose an item. | <input type="checkbox"/>        | <input type="checkbox"/>                        | <input type="checkbox"/>                                |

\*: It is a table-form question asking for the health status of the dog, including 117 diseases. <sup>©</sup>: The question used in the current study. <sup>¥</sup>: The dichotomous variable used as the main dependent variable in the study.
