# Supplementary material for: Puppyhood diet as a factor in the development of owner‐reported allergy/atopy skin signs in adult dogs in Finland
Source: PubMed Central journal article supplement (PMC8478020; doi:10.1111/jvim.16211), 2021-07-14
Supplement: JVIM-35-2374-s002.pdf [file JVIM-35-2374-s002.pdf]

**S1 Table.** Association between puppyhood food variables and incidence of owner-reported allergy/atopy skin symptoms (AASS) in dogs above 1 year old.

| Food items           | Categories                | 4108 dogs population      |                           | P value | Multivariate logistic regression |
|----------------------|---------------------------|---------------------------|---------------------------|---------|----------------------------------|
|                      |                           | Cases, %<br>(n=762)       | Controls, %<br>(n=2346)   |         |                                  |
| 1. Berries           | Never                     | 51.8 (1165 <sup>a</sup> ) | 56.0 (506 <sup>b</sup> )  | .10     | Included                         |
|                      | A couple of times / year  | 23.1 (209 <sup>a</sup> )  | 25.3 (570 <sup>a</sup> )  |         |                                  |
|                      | A couple of times / month | 15.3 (138 <sup>a</sup> )  | 16.5 (372 <sup>a</sup> )  |         |                                  |
|                      | A couple of times / week  | 4.9 (44 <sup>a</sup> )    | 4.7 (106 <sup>a</sup> )   |         |                                  |
|                      | Always or almost always   | 0.8 (7 <sup>a</sup> )     | 1.6 (36 <sup>a</sup> )    |         |                                  |
| 2. Raw vegetables    | Never                     | 50.4 (465 <sup>a</sup> )  | 47.3 (1077 <sup>a</sup> ) | .15     | Included                         |
|                      | A couple of times / year  | 11.4 (105 <sup>a</sup> )  | 13.4 (304 <sup>a</sup> )  |         |                                  |
|                      | A couple of times / month | 19.7 (182 <sup>a</sup> )  | 20.4 (465 <sup>a</sup> )  |         |                                  |
|                      | A couple of times / week  | 13.2 (122 <sup>a</sup> )  | 12.0 (274 <sup>a</sup> )  |         |                                  |
|                      | Always or almost always   | 5.3 (49 <sup>a</sup> )    | 6.9 (156 <sup>a</sup> )   |         |                                  |
| 3. Cooked vegetables | Never                     | 60.4 (559 <sup>a</sup> )  | 51.2 (1196 <sup>a</sup> ) | < .001  | Included                         |
|                      | A couple of times / year  | 9.0 (83 <sup>b</sup> )    | 11.3 (264 <sup>a</sup> )  |         |                                  |
|                      | A couple of times / month | 16.2 (150 <sup>a</sup> )  | 15.8 (432 <sup>a</sup> )  |         |                                  |
|                      | A couple of times / week  | 9.8 (91 <sup>a</sup> )    | 11.9 (278 <sup>a</sup> )  |         |                                  |
|                      | Always or almost always   | 4.6 (43 <sup>b</sup> )    | 7.0 (164 <sup>a</sup> )   |         |                                  |
| 4. Cooked potatoes   | Never                     | 48.4 (462 <sup>a</sup> )  | 46.7 (1097 <sup>a</sup> ) | .06     | Included                         |
|                      | A couple of times / year  | 23.2 (222 <sup>a</sup> )  | 22.9 (537 <sup>a</sup> )  |         |                                  |
|                      | A couple of times / month | 18.0 (172 <sup>b</sup> )  | 21.1 (496 <sup>a</sup> )  |         |                                  |
|                      | A couple of times / week  | 9.2 (88 <sup>a</sup> )    | 7.4 (174 <sup>a</sup> )   |         |                                  |
|                      | Always or almost always   | 1.2 (11 <sup>a</sup> )    | 1.9 (45 <sup>a</sup> )    |         |                                  |
| 5. Fruits            | Never                     | 53.2 (397 <sup>b</sup> )  | 57.6 (993 <sup>a</sup> )  | .01     | Included                         |
|                      | A couple of times / year  | 18.4 (137 <sup>a</sup> )  | 15.4 (266 <sup>a</sup> )  |         |                                  |
|                      | A couple of times / month | 20.5 (153 <sup>b</sup> )  | 17.0 (293 <sup>a</sup> )  |         |                                  |
|                      | A couple of times / week  | 6.8 (51 <sup>a</sup> )    | 7.7 (132 <sup>a</sup> )   |         |                                  |

|                               |                           |                          |                           |                  |              |
|-------------------------------|---------------------------|--------------------------|---------------------------|------------------|--------------|
|                               | Always or almost always   | 1.1 (8 <sup>b</sup> )    | 2.3 (39 <sup>a</sup> )    |                  |              |
| 6. Raw tripe                  | Never                     | 71.9 (668 <sup>a</sup> ) | 63.3 (1478 <sup>a</sup> ) | <b>&lt; .001</b> | Included     |
|                               | A couple of times / year  | 5.9 (55 <sup>a</sup> )   | 7.0 (163 <sup>a</sup> )   |                  |              |
|                               | A couple of times / month | 12.9 (120 <sup>b</sup> ) | 15.8 (370 <sup>a</sup> )  |                  |              |
|                               | A couple of times / week  | 7.5 (70 <sup>a</sup> )   | 9.4 (220 <sup>a</sup> )   |                  |              |
|                               | Always or almost always   | 1.7 (16 <sup>b</sup> )   | 4.5 (105 <sup>a</sup> )   |                  |              |
| 7. Cooked tripe               | Never                     | 80.3 (736 <sup>a</sup> ) | 80.1 (1808 <sup>a</sup> ) | .80              | Not included |
|                               | A couple of times / year  | 7 (64 <sup>a</sup> )     | 8 (180 <sup>a</sup> )     |                  |              |
|                               | A couple of times / month | 7.3 (67 <sup>a</sup> )   | 7.2 (163 <sup>a</sup> )   |                  |              |
|                               | A couple of times / week  | 3.7 (34 <sup>a</sup> )   | 3.3 (74 <sup>a</sup> )    |                  |              |
|                               | Always or almost always   | 1.7 (16 <sup>a</sup> )   | 1.4 (32 <sup>a</sup> )    |                  |              |
| 8. Cooked organ meats         | Never                     | 75.8 (681 <sup>b</sup> ) | 67.8 (1526 <sup>a</sup> ) | <b>&lt; .001</b> | Included     |
|                               | A couple of times / year  | 7.6 (68 <sup>b</sup> )   | 12.0 (269 <sup>a</sup> )  |                  |              |
|                               | A couple of times / month | 10.3 (93 <sup>b</sup> )  | 13.3 (300 <sup>a</sup> )  |                  |              |
|                               | A couple of times / week  | 4.4 (40 <sup>a</sup> )   | 5.3 (119 <sup>a</sup> )   |                  |              |
|                               | Always or almost always   | 1.9 (17 <sup>a</sup> )   | 1.6 (36 <sup>a</sup> )    |                  |              |
| 9. Raw organ meats            | Never                     | 84.7 (752 <sup>b</sup> ) | 77.3 (1697 <sup>a</sup> ) | <b>&lt; .001</b> | Included     |
|                               | A couple of times / year  | 3.2 (28 <sup>b</sup> )   | 5.7 (126 <sup>a</sup> )   |                  |              |
|                               | A couple of times / month | 7.5 (67 <sup>b</sup> )   | 10.1 (221 <sup>a</sup> )  |                  |              |
|                               | A couple of times / week  | 3.5 (31 <sup>a</sup> )   | 5.1 (111 <sup>a</sup> )   |                  |              |
|                               | Always or almost always   | 1.1 (10 <sup>a</sup> )   | 1.8 (40 <sup>a</sup> )    |                  |              |
| 10. Raw bone and cartilage    | Never                     | 44.0 (433 <sup>b</sup> ) | 36.0 (881 <sup>a</sup> )  | <b>&lt; .001</b> | Included     |
|                               | A couple of times / year  | 12.3 (121 <sup>b</sup> ) | 15.7 (385 <sup>a</sup> )  |                  |              |
|                               | A couple of times / month | 24.3 (239 <sup>a</sup> ) | 25.5 (623 <sup>a</sup> )  |                  |              |
|                               | A couple of times / week  | 13.2 (130 <sup>a</sup> ) | 15.1 (369 <sup>a</sup> )  |                  |              |
|                               | Always or almost always   | 6.2 (61 <sup>a</sup> )   | 7.7 (188 <sup>a</sup> )   |                  |              |
| 11. Cooked bone and cartilage | Never                     | 51.6 (502 <sup>b</sup> ) | 47.7 (1148 <sup>a</sup> ) | .13              | Included     |
|                               | A couple of times / year  | 15.3 (149 <sup>a</sup> ) | 18.0 (434 <sup>a</sup> )  |                  |              |
|                               | A couple of times / month | 20.7 (201 <sup>a</sup> ) | 22.8 (549 <sup>a</sup> )  |                  |              |
|                               | A couple of times / week  | 10.2 (99 <sup>a</sup> )  | 9.3 (224 <sup>a</sup> )   |                  |              |

|                         |                           |                          |                           |                  |              |
|-------------------------|---------------------------|--------------------------|---------------------------|------------------|--------------|
|                         | Always or almost always   | 2.2 (21 <sup>a</sup> )   | 2.1 (50 <sup>a</sup> )    |                  |              |
| 12. Sour milk products  | Never                     | 0.5 (4 <sup>a</sup> )    | 0.2 (5 <sup>a</sup> )     | <b>.02</b>       | Included     |
|                         | A couple of times / year  | 10.7 (91 <sup>b</sup> )  | 8.0 (169 <sup>a</sup> )   |                  |              |
|                         | A couple of times / month | 31.1 (264 <sup>a</sup> ) | 28.7 (607 <sup>a</sup> )  |                  |              |
|                         | A couple of times / week  | 35.2 (299 <sup>a</sup> ) | 36.4 (771 <sup>a</sup> )  |                  |              |
|                         | Always or almost always   | 22.6 (192 <sup>b</sup> ) | 26.7 (565 <sup>a</sup> )  |                  |              |
| 13. Other milk products | Never                     | 57.2 (549 <sup>a</sup> ) | 52.5 (1260 <sup>a</sup> ) | .09              | Included     |
|                         | A couple of times / year  | 28.7 (275 <sup>a</sup> ) | 30.8 (738 <sup>a</sup> )  |                  |              |
|                         | A couple of times / month | 10.9 (105 <sup>a</sup> ) | 12.2 (293 <sup>a</sup> )  |                  |              |
|                         | A couple of times / week  | 2.3 (22 <sup>a</sup> )   | 3.2 (76 <sup>a</sup> )    |                  |              |
|                         | Always or almost always   | 0.8 (8 <sup>a</sup> )    | 1.3 (31 <sup>a</sup> )    |                  |              |
| 14. Cheese              | Never                     | 0.4 (2 <sup>a</sup> )    | 0.6 (8 <sup>a</sup> )     | .65              | Not included |
|                         | A couple of times / year  | 28.7 (158 <sup>a</sup> ) | 29.9 (395 <sup>a</sup> )  |                  |              |
|                         | A couple of times / month | 46.2 (254 <sup>a</sup> ) | 46.7 (618 <sup>a</sup> )  |                  |              |
|                         | A couple of times / week  | 21.6 (119 <sup>a</sup> ) | 19.0 (252 <sup>a</sup> )  |                  |              |
|                         | Always or almost always   | 3.1 (17 <sup>a</sup> )   | 3.8 (50 <sup>a</sup> )    |                  |              |
| 15. Vegetable oils      | Never                     | 33.3 (323 <sup>a</sup> ) | 27.8 (657 <sup>a</sup> )  | <b>.001</b>      | Included     |
|                         | A couple of times / year  | 7.9 (77 <sup>b</sup> )   | 11.8 (280 <sup>a</sup> )  |                  |              |
|                         | A couple of times / month | 20.4 (198 <sup>a</sup> ) | 22.4 (529 <sup>a</sup> )  |                  |              |
|                         | A couple of times / week  | 22.7 (220 <sup>a</sup> ) | 22.0 (521 <sup>a</sup> )  |                  |              |
|                         | Always or almost always   | 15.8 (153 <sup>a</sup> ) | 16.0 (379 <sup>a</sup> )  |                  |              |
| 16. Fish oil            | Never                     | 65.8 (586 <sup>a</sup> ) | 62.9 (1369 <sup>a</sup> ) | <b>&lt; .001</b> | Included     |
|                         | A couple of times / year  | 5.8 (52 <sup>b</sup> )   | 8.4 (182 <sup>a</sup> )   |                  |              |
|                         | A couple of times / month | 11.3 (101 <sup>b</sup> ) | 15.1 (329 <sup>a</sup> )  |                  |              |
|                         | A couple of times / week  | 10.4 (93 <sup>a</sup> )  | 9.1 (199 <sup>a</sup> )   |                  |              |
|                         | Always or almost always   | 6.6 (59 <sup>b</sup> )   | 4.4 (96 <sup>a</sup> )    |                  |              |
| 17. Mixed oils          | Never                     | 86.5 (643 <sup>b</sup> ) | 91.6 (1605 <sup>a</sup> ) | <b>&lt; .001</b> | Included     |
|                         | A couple of times / year  | 2.6 (19 <sup>a</sup> )   | 2.2 (38 <sup>a</sup> )    |                  |              |
|                         | A couple of times / month | 2.8 (21 <sup>a</sup> )   | 2.7 (47 <sup>a</sup> )    |                  |              |
|                         | A couple of times / week  | 2.6 (19 <sup>a</sup> )   | 1.9 (34 <sup>a</sup> )    |                  |              |

|                      |                           |                           |                           |                  |              |
|----------------------|---------------------------|---------------------------|---------------------------|------------------|--------------|
|                      | Always or almost always   | 5.5 (41 <sup>b</sup> )    | 1.7 (29 <sup>a</sup> )    |                  |              |
| 18. Animal fat       | Never                     | 82.0 (579 <sup>b</sup> )  | 73.7 (1222 <sup>a</sup> ) | <b>&lt; .001</b> | Included     |
|                      | A couple of times / year  | 6.7 (47 <sup>a</sup> )    | 8.4 (140 <sup>a</sup> )   |                  |              |
|                      | A couple of times / month | 5.8 (41 <sup>b</sup> )    | 9.6 (159 <sup>a</sup> )   |                  |              |
|                      | A couple of times / week  | 4.5 (32 <sup>a</sup> )    | 5.6 (92 <sup>a</sup> )    |                  |              |
|                      | Always or almost always   | 1.0 (7 <sup>b</sup> )     | 2.7 (44 <sup>a</sup> )    |                  |              |
| 19. Raw eggs         | Never                     | 55.2 (523 <sup>b</sup> )  | 48.2 (1138 <sup>a</sup> ) | <b>&lt; .001</b> | Included     |
|                      | A couple of times / year  | 11.7 (111 <sup>b</sup> )  | 15.5 (367 <sup>a</sup> )  |                  |              |
|                      | A couple of times / month | 22.3 (211 <sup>a</sup> )  | 22.4 (528 <sup>a</sup> )  |                  |              |
|                      | A couple of times / week  | 9.9 (94 <sup>a</sup> )    | 11.5 (271 <sup>a</sup> )  |                  |              |
|                      | Always or almost always   | 0.9 (9 <sup>b</sup> )     | 2.4 (57 <sup>a</sup> )    |                  |              |
| 20. Cooked eggs      | Never                     | 57.7 (532 <sup>b</sup> )  | 48.4 (1114 <sup>a</sup> ) | <b>&lt; .001</b> | Included     |
|                      | A couple of times / year  | 16.4 (151 <sup>a</sup> )  | 18.3 (421 <sup>a</sup> )  |                  |              |
|                      | A couple of times / month | 18.0 (166 <sup>b</sup> )  | 24.0 (552 <sup>a</sup> )  |                  |              |
|                      | A couple of times / week  | 5.7 (53 <sup>a</sup> )    | 7.2 (166 <sup>a</sup> )   |                  |              |
|                      | Always or almost always   | 2.2 (20 <sup>a</sup> )    | 2.2 (50 <sup>a</sup> )    |                  |              |
| 21. Dry food         | Never                     | 3.4 (39 <sup>a</sup> )    | 4.6 (130 <sup>a</sup> )   | <b>.02</b>       | Included     |
|                      | A couple of times / year  | 1.0 (12 <sup>a</sup> )    | 1.5 (41 <sup>a</sup> )    |                  |              |
|                      | A couple of times / month | 1.0 (12 <sup>a</sup> )    | 1.8 (50 <sup>a</sup> )    |                  |              |
|                      | A couple of times / week  | 4.8 (55 <sup>a</sup> )    | 6.3 (178 <sup>a</sup> )   |                  |              |
|                      | Always or almost always   | 89.7 (1026 <sup>b</sup> ) | 85.8 (2416 <sup>a</sup> ) |                  |              |
| 22. Wet food*        | Never                     | 55.7 (549 <sup>a</sup> )  | 53.4 (1280 <sup>a</sup> ) | <b>.48</b>       | Not included |
|                      | A couple of times / year  | 13.0 (128 <sup>a</sup> )  | 15.0 (359 <sup>a</sup> )  |                  |              |
|                      | A couple of times / month | 17.5 (172 <sup>a</sup> )  | 18.0 (432 <sup>a</sup> )  |                  |              |
|                      | A couple of times / week  | 9.5 (94 <sup>a</sup> )    | 8.8 (211 <sup>a</sup> )   |                  |              |
|                      | Always or almost always   | 4.3 (42 <sup>a</sup> )    | 4.7 (113 <sup>a</sup> )   |                  |              |
| 23. Medical dry food | Never                     | 94.5 (812 <sup>b</sup> )  | 99.0 (2088 <sup>a</sup> ) | <b>&lt; .001</b> | Included     |
|                      | A couple of times / year  | 0.8 (7 <sup>a</sup> )     | 0.3 (7 <sup>a</sup> )     |                  |              |
|                      | A couple of times / month | 0.8 (7 <sup>b</sup> )     | 0.2 (4 <sup>a</sup> )     |                  |              |
|                      | A couple of times / week  | 1.0 (9 <sup>b</sup> )     | 0.04 (1 <sup>a</sup> )    |                  |              |

|                          |                           |                          |                           |                  |              |
|--------------------------|---------------------------|--------------------------|---------------------------|------------------|--------------|
|                          | Always or almost always   | 2.8 (24 <sup>b</sup> )   | 0.5 (10 <sup>a</sup> )    |                  |              |
| 24. Blood crepes         | Never                     | 83.9 (762 <sup>b</sup> ) | 74.9 (1681 <sup>a</sup> ) | <b>&lt; .001</b> | Included     |
|                          | A couple of times / year  | 8.6 (78 <sup>b</sup> )   | 14.5 (326 <sup>a</sup> )  |                  |              |
|                          | A couple of times / month | 5.7 (52 <sup>b</sup> )   | 8.6 (194 <sup>a</sup> )   |                  |              |
|                          | A couple of times / week  | 1.7 (15 <sup>a</sup> )   | 1.7 (38 <sup>a</sup> )    |                  |              |
|                          | Always or almost always   | 0.1 (1 <sup>a</sup> )    | 0.2 (5 <sup>a</sup> )     |                  |              |
| 25. Liver casserole      | Never                     | 42.6 (423 <sup>b</sup> ) | 34.9 (860 <sup>a</sup> )  | <b>&lt; .001</b> | Included     |
|                          | A couple of times / year  | 23.3 (231 <sup>b</sup> ) | 26.9 (662 <sup>a</sup> )  |                  |              |
|                          | A couple of times / month | 27.0 (268 <sup>a</sup> ) | 28.7 (707 <sup>a</sup> )  |                  |              |
|                          | A couple of times / week  | 6.3 (63 <sup>b</sup> )   | 8.6 (213 <sup>a</sup> )   |                  |              |
|                          | Always or almost always   | 0.8 (8 <sup>a</sup> )    | 0.9 (22 <sup>a</sup> )    |                  |              |
| 26. Dried fish           | Never                     | 80.5 (711 <sup>a</sup> ) | 79.2 (1740 <sup>a</sup> ) | .09              | Included     |
|                          | A couple of times / year  | 9.2 (81 <sup>b</sup> )   | 12.0 (263 <sup>a</sup> )  |                  |              |
|                          | A couple of times / month | 7.4 (65 <sup>a</sup> )   | 7.0 (153 <sup>a</sup> )   |                  |              |
|                          | A couple of times / week  | 2.7 (24 <sup>a</sup> )   | 1.7 (38 <sup>a</sup> )    |                  |              |
|                          | Always or almost always   | 0.2 (2 <sup>a</sup> )    | 0.1 (3 <sup>a</sup> )     |                  |              |
| 27. Human meal leftovers | Never                     | 31.9 (314 <sup>b</sup> ) | 21.2 (527 <sup>a</sup> )  | <b>&lt; .001</b> | Included     |
|                          | A couple of times / year  | 23.1 (227 <sup>a</sup> ) | 22.5 (561 <sup>a</sup> )  |                  |              |
|                          | A couple of times / month | 26.1 (257 <sup>a</sup> ) | 29.2 (728 <sup>a</sup> )  |                  |              |
|                          | A couple of times / week  | 14.7 (145 <sup>b</sup> ) | 19.6 (489 <sup>a</sup> )  |                  |              |
|                          | Always or almost always   | 4.2 (41 <sup>b</sup> )   | 7.5 (186 <sup>a</sup> )   |                  |              |
| 28. Cooked porridge      | Never                     | 26.4 (262 <sup>b</sup> ) | 20.0 (500 <sup>a</sup> )  | <b>&lt; .001</b> | Included     |
|                          | A couple of times / year  | 22.1 (219 <sup>b</sup> ) | 18.7 (466 <sup>a</sup> )  |                  |              |
|                          | A couple of times / month | 24.9 (247 <sup>b</sup> ) | 29.5 (738 <sup>a</sup> )  |                  |              |
|                          | A couple of times / week  | 17.5 (174 <sup>a</sup> ) | 19.7 (492 <sup>a</sup> )  |                  |              |
|                          | Always or almost always   | 9.1 (90 <sup>b</sup> )   | 12.1 (302 <sup>a</sup> )  |                  |              |
| 29. Cooked rice          | Never                     | 14.9 (152 <sup>a</sup> ) | 13.9 (349 <sup>a</sup> )  | .83              | Not included |
|                          | A couple of times / year  | 18.3 (186 <sup>a</sup> ) | 18.1 (455 <sup>a</sup> )  |                  |              |
|                          | A couple of times / month | 35.0 (356 <sup>a</sup> ) | 34.4 (864 <sup>a</sup> )  |                  |              |
|                          | A couple of times / week  | 20.6 (210 <sup>a</sup> ) | 21.3 (534 <sup>a</sup> )  |                  |              |

|                     |                           |                          |                          |             |              |
|---------------------|---------------------------|--------------------------|--------------------------|-------------|--------------|
|                     | Always or almost always   | 11.1 (113 <sup>a</sup> ) | 12.2 (306 <sup>a</sup> ) |             |              |
| 30. Treats          | Never                     | 9.6 (98 <sup>a</sup> )   | 9.2 (236 <sup>a</sup> )  | .05         | Included     |
|                     | A couple of times / year  | 12.2 (125 <sup>a</sup> ) | 13.8 (354 <sup>a</sup> ) |             |              |
|                     | A couple of times / month | 26.5 (272 <sup>a</sup> ) | 29.7 (761 <sup>a</sup> ) |             |              |
|                     | A couple of times / week  | 38.0 (390 <sup>b</sup> ) | 33.1 (848 <sup>a</sup> ) |             |              |
|                     | Always or almost always   | 13.7 (141 <sup>a</sup> ) | 14.2 (365 <sup>a</sup> ) |             |              |
| 31. Rawhides        | Never                     | 4.7 (49 <sup>b</sup> )   | 6.5 (170 <sup>a</sup> )  | <b>.04</b>  | Included     |
|                     | A couple of times / year  | 9.6 (100 <sup>a</sup> )  | 11.4 (297 <sup>a</sup> ) |             |              |
|                     | A couple of times / month | 28.1 (294 <sup>a</sup> ) | 28.3 (736 <sup>a</sup> ) |             |              |
|                     | A couple of times / week  | 36.1 (378 <sup>a</sup> ) | 35.0 (911 <sup>a</sup> ) |             |              |
|                     | Always or almost always   | 21.6 (226 <sup>a</sup> ) | 18.8 (488 <sup>a</sup> ) |             |              |
| 32. Raw poultry     | Never                     | 79.3 (411 <sup>a</sup> ) | 79.0 (874 <sup>a</sup> ) | .99         | Not included |
|                     | A couple of times / year  | 1.4 (7 <sup>a</sup> )    | 1.6 (18 <sup>a</sup> )   |             |              |
|                     | A couple of times / month | 5.0 (26 <sup>a</sup> )   | 5.2 (58 <sup>a</sup> )   |             |              |
|                     | A couple of times / week  | 8.1 (42 <sup>a</sup> )   | 7.8 (86 <sup>a</sup> )   |             |              |
|                     | Always or almost always   | 6.2 (32 <sup>a</sup> )   | 6.3 (70 <sup>a</sup> )   |             |              |
| 33. Cooked poultry  | Never                     | 36.3 (348 <sup>a</sup> ) | 35.5 (847 <sup>a</sup> ) | .55         | Not included |
|                     | A couple of times / year  | 9.7 (93 <sup>a</sup> )   | 11.7 (278 <sup>a</sup> ) |             |              |
|                     | A couple of times / month | 27.5 (264 <sup>a</sup> ) | 26.4 (628 <sup>a</sup> ) |             |              |
|                     | A couple of times / week  | 19.5 (187 <sup>a</sup> ) | 19.8 (472 <sup>a</sup> ) |             |              |
|                     | Always or almost always   | 7.0 (67 <sup>a</sup> )   | 6.6 (158 <sup>a</sup> )  |             |              |
| 34. Raw red meat    | Never                     | 40.0 (362 <sup>a</sup> ) | 33.1 (718 <sup>a</sup> ) | <b>.002</b> | Included     |
|                     | A couple of times / year  | 6.0 (54 <sup>a</sup> )   | 7.8 (169 <sup>a</sup> )  |             |              |
|                     | A couple of times / month | 21.9 (198 <sup>a</sup> ) | 21.6 (469 <sup>a</sup> ) |             |              |
|                     | A couple of times / week  | 18.3 (166 <sup>b</sup> ) | 21.9 (475 <sup>a</sup> ) |             |              |
|                     | Always or almost always   | 13.8 (125 <sup>a</sup> ) | 15.7 (340 <sup>a</sup> ) |             |              |
| 35. Cooked red meat | Never                     | 44.2 (363 <sup>a</sup> ) | 44.8 (884 <sup>a</sup> ) | .51         | Not included |
|                     | A couple of times / year  | 6.7 (55 <sup>a</sup> )   | 8.3 (164 <sup>a</sup> )  |             |              |
|                     | A couple of times / month | 23.5 (193 <sup>a</sup> ) | 21.3 (421 <sup>a</sup> ) |             |              |
|                     | A couple of times / week  | 18.3 (150 <sup>a</sup> ) | 18.3 (361 <sup>a</sup> ) |             |              |

|                                       |                           |                          |                           |        |              |
|---------------------------------------|---------------------------|--------------------------|---------------------------|--------|--------------|
|                                       | Always or almost always   | 7.3 (60 <sup>a</sup> )   | 7.2 (142 <sup>a</sup> )   |        |              |
| 36. Processed meat                    | Never                     | 19.0 (194 <sup>a</sup> ) | 17.0 (429 <sup>a</sup> )  | .49    | Not included |
|                                       | A couple of times / year  | 20.2 (206 <sup>a</sup> ) | 21.0 (528 <sup>a</sup> )  |        |              |
|                                       | A couple of times / month | 35.5 (362 <sup>a</sup> ) | 35.0 (882 <sup>a</sup> )  |        |              |
|                                       | A couple of times / week  | 22.1 (225 <sup>a</sup> ) | 24.1 (606 <sup>a</sup> )  |        |              |
|                                       | Always or almost always   | 3.2 (33 <sup>a</sup> )   | 2.9 (72 <sup>a</sup> )    |        |              |
| 37. Raw fish                          | Never                     | 79.6 (716 <sup>b</sup> ) | 75.3 (1675 <sup>a</sup> ) | .09    | Included     |
|                                       | A couple of times / year  | 4.8 (43 <sup>b</sup> )   | 6.7 (148 <sup>a</sup> )   |        |              |
|                                       | A couple of times / month | 9.8 (88 <sup>a</sup> )   | 11.3 (251 <sup>a</sup> )  |        |              |
|                                       | A couple of times / week  | 5.0 (45 <sup>a</sup> )   | 5.5 (123 <sup>a</sup> )   |        |              |
|                                       | Always or almost always   | 0.8 (7 <sup>a</sup> )    | 1.2 (26 <sup>a</sup> )    |        |              |
| 38. Cooked fish                       | Never                     | 54.3 (503 <sup>b</sup> ) | 46.0 (1062 <sup>a</sup> ) | < .001 | Included     |
|                                       | A couple of times / year  | 15.7 (145 <sup>b</sup> ) | 18.6 (430 <sup>a</sup> )  |        |              |
|                                       | A couple of times / month | 23.3 (216 <sup>b</sup> ) | 27.5 (636 <sup>a</sup> )  |        |              |
|                                       | A couple of times / week  | 5.8 (54 <sup>a</sup> )   | 7.3 (169 <sup>a</sup> )   |        |              |
|                                       | Always or almost always   | 0.9 (8 <sup>a</sup> )    | 0.6 (13 <sup>a</sup> )    |        |              |
| 39. Eating sticks outside             | Never                     | 16.1 (162 <sup>b</sup> ) | 21.4 (530 <sup>a</sup> )  | < .001 | Included     |
|                                       | A couple of times / year  | 16.9 (170 <sup>a</sup> ) | 18.6 (460 <sup>a</sup> )  |        |              |
|                                       | A couple of times / month | 26.1 (262 <sup>a</sup> ) | 25.6 (635 <sup>a</sup> )  |        |              |
|                                       | A couple of times / week  | 30.7 (309 <sup>b</sup> ) | 22.9 (566 <sup>a</sup> )  |        |              |
|                                       | Always or almost always   | 10.1 (102 <sup>a</sup> ) | 11.5 (286 <sup>a</sup> )  |        |              |
| 40. Eating grass outside              | Never                     | 10.0 (101 <sup>a</sup> ) | 9.0 (229 <sup>a</sup> )   | .83    | Not included |
|                                       | A couple of times / year  | 18.4 (187 <sup>a</sup> ) | 19.8 (501 <sup>a</sup> )  |        |              |
|                                       | A couple of times / month | 34.4 (349 <sup>a</sup> ) | 34.5 (876 <sup>a</sup> )  |        |              |
|                                       | A couple of times / week  | 27.2 (276 <sup>a</sup> ) | 26.5 (671 <sup>a</sup> )  |        |              |
|                                       | Always or almost always   | 10.0 (102 <sup>a</sup> ) | 10.2 (259 <sup>a</sup> )  |        |              |
| 41. Eating clay and stones<br>outside | Never                     | 64.3 (597 <sup>a</sup> ) | 66.8 (1529 <sup>a</sup> ) | .31    | Not included |
|                                       | A couple of times / year  | 15.8 (147 <sup>a</sup> ) | 14.9 (340 <sup>a</sup> )  |        |              |
|                                       | A couple of times / month | 11.4 (106 <sup>a</sup> ) | 9.3 (214 <sup>a</sup> )   |        |              |
|                                       | A couple of times / week  | 6.3 (58 <sup>a</sup> )   | 6.2 (143 <sup>a</sup> )   |        |              |

|                                   |                           |                          |                           |                  |          |
|-----------------------------------|---------------------------|--------------------------|---------------------------|------------------|----------|
|                                   | Always or almost always   | 2.2 (20 <sup>a</sup> )   | 2.8 (63 <sup>a</sup> )    |                  |          |
| 42. Eating dirt outside           | Never                     | 54.0 (506 <sup>a</sup> ) | 57.7 (1347 <sup>a</sup> ) | <b>.01</b>       | Included |
|                                   | A couple of times / year  | 25.1 (235 <sup>b</sup> ) | 21.7 (507 <sup>a</sup> )  |                  |          |
|                                   | A couple of times / month | 13.2 (124 <sup>a</sup> ) | 12.0 (280 <sup>a</sup> )  |                  |          |
|                                   | A couple of times / week  | 6.8 (64 <sup>a</sup> )   | 6.5 (151 <sup>a</sup> )   |                  |          |
|                                   | Always or almost always   | 0.9 (8 <sup>b</sup> )    | 2.1 (50 <sup>a</sup> )    |                  |          |
| 43. Drinking from puddles outside | Never                     | 11.6 (118 <sup>a</sup> ) | 10.6 (268 <sup>a</sup> )  | <b>.001</b>      | Included |
|                                   | A couple of times / year  | 20.3 (206 <sup>a</sup> ) | 18.0 (457 <sup>a</sup> )  |                  |          |
|                                   | A couple of times / month | 32.1 (325 <sup>a</sup> ) | 29.3 (743 <sup>a</sup> )  |                  |          |
|                                   | A couple of times / week  | 26.8 (272 <sup>a</sup> ) | 28.3 (716 <sup>a</sup> )  |                  |          |
|                                   | Always or almost always   | 9.2 (93 <sup>b</sup> )   | 13.8 (349 <sup>a</sup> )  |                  |          |
| 44. Eating feces outside          | Never                     | 39.0 (379 <sup>a</sup> ) | 40.6 (972 <sup>a</sup> )  | <b>.02</b>       | Included |
|                                   | A couple of times / year  | 22.3 (217 <sup>a</sup> ) | 22.2 (531 <sup>a</sup> )  |                  |          |
|                                   | A couple of times / month | 21.3 (207 <sup>a</sup> ) | 20.2 (483 <sup>a</sup> )  |                  |          |
|                                   | A couple of times / week  | 11.5 (112 <sup>a</sup> ) | 13.5 (323 <sup>a</sup> )  |                  |          |
|                                   | Always or almost always   | 5.9 (57 <sup>b</sup> )   | 3.6 (85 <sup>a</sup> )    |                  |          |
| 45. Eating carcasses outside      | Never                     | 70.0 (651 <sup>b</sup> ) | 61.9 (1444 <sup>a</sup> ) | <b>&lt; .001</b> | Included |
|                                   | A couple of times / year  | 20.2 (188 <sup>b</sup> ) | 23.4 (547 <sup>a</sup> )  |                  |          |
|                                   | A couple of times / month | 7.5 (70 <sup>b</sup> )   | 11.1 (259 <sup>a</sup> )  |                  |          |
|                                   | A couple of times / week  | 1.9 (18 <sup>a</sup> )   | 2.8 (66 <sup>a</sup> )    |                  |          |
|                                   | Always or almost always   | 0.3 (3 <sup>a</sup> )    | 0.7 (17 <sup>a</sup> )    |                  |          |
| 46. Dried animal parts            | Never                     | 13.2 (136 <sup>a</sup> ) | 14.1 (356 <sup>a</sup> )  | .10              | Included |
|                                   | A couple of times / year  | 12.1 (124 <sup>b</sup> ) | 15.1 (382 <sup>a</sup> )  |                  |          |
|                                   | A couple of times / month | 41.8 (430 <sup>a</sup> ) | 40.6 (1027 <sup>a</sup> ) |                  |          |
|                                   | A couple of times / week  | 29.1 (299 <sup>a</sup> ) | 26.3 (665 <sup>a</sup> )  |                  |          |
|                                   | Always or almost always   | 3.9 (40 <sup>a</sup> )   | 3.8 (97 <sup>a</sup> )    |                  |          |

<sup>a,b</sup> Means the different superscripts are significantly different within the same row ( $P < .05$ ). \* : refers

to canned or tinned food, plastic wrapped dog wet food, and other forms of dog wet food in bags.

**Bolded:** significant p-value  $< .05$ .
